# Supplementary material for: Localization Patterns of Cathepsins K and X and their Predictive Value in Glioblastoma
Source: PubMed Central journal article supplement — Radiol Oncol. 2018 Oct 18;52(4):433–42. doi: 10.2478/raon-2018-0040 (PMC6287179; doi:10.2478/raon-2018-0040), 2018-10-18
Supplement: raon-52-433_sm.pdf [file raon-52-433_sm.pdf]

# Localization patterns of cathepsins K and X and their predictive value in glioblastoma

Barbara Breznik, Clara Limback, Andrej Porcnik, Andrej Blejec, Miha Koprivnikar Krajnc, Roman Bosnjak, Janko Kos, Cornelis J.F. Van Noorden, Tamara T. Lah

doi: 10.2478/raon-2018-0040

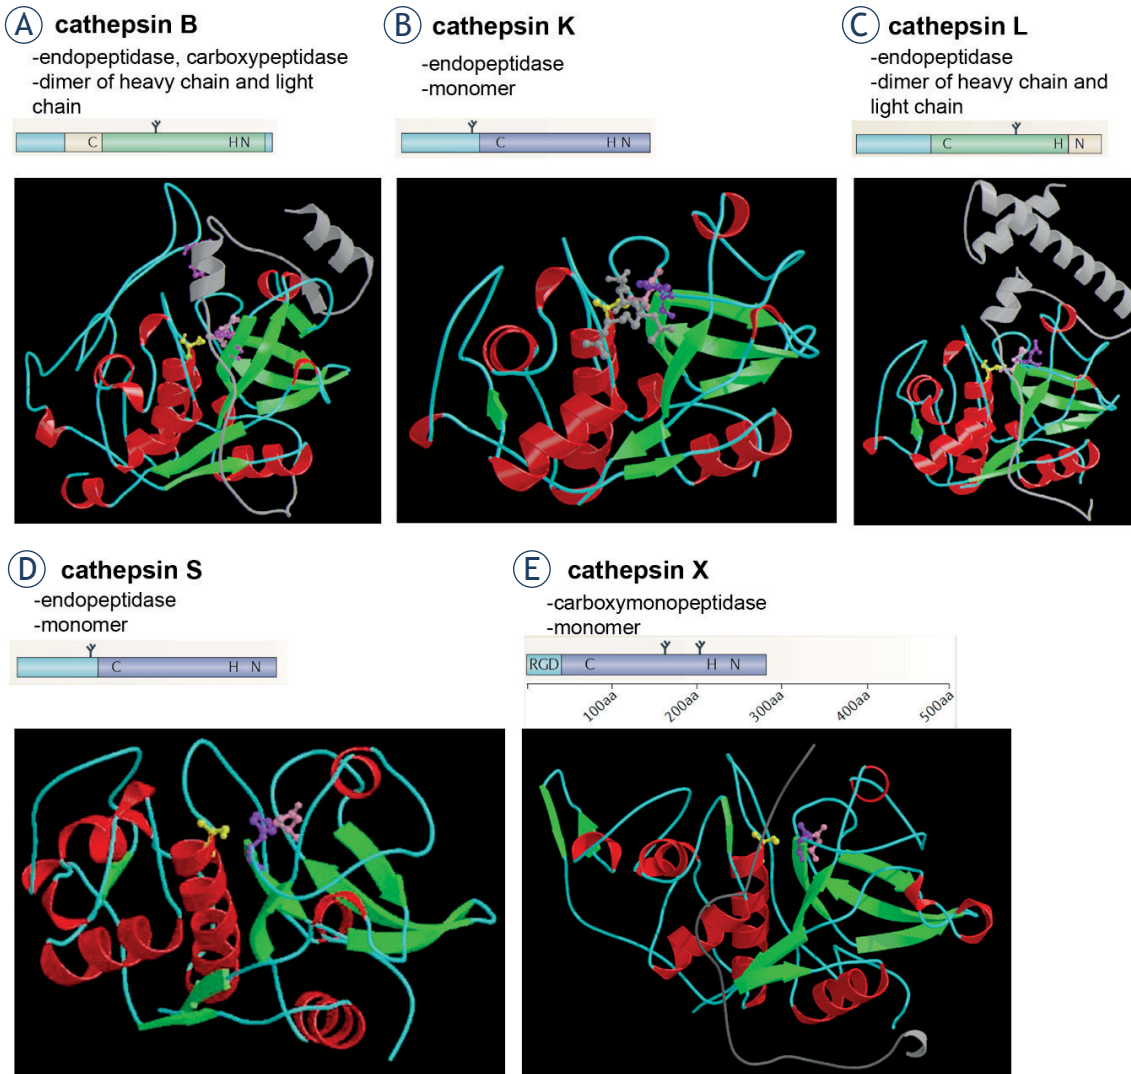

**Legend**

- Propeptide
- Exclusion domain chain
- Mini chain
- Light chain
- Heavy chain
- Main chain
- CHN Catalytic triad
- RGD Integrin-binding motif
- Y N-linked glycosylation

**FIGURE S1.** Relationship between catalytic activities and structures of cathepsins B, K, L, S and X. Catalytic activity, subunit structure and 3D structures of (A) cathepsin B, (B) cathepsin K, (C) cathepsin L, (D) cathepsin S and (E) cathepsin X. Subunit structures of cathepsins were taken from Olson and Joyce<sup>6</sup>, and 3D structures were taken from MEROPS peptidase database.<sup>60</sup>

The explanations of 3D structures of cathepsins: (A) Catalytic residues are shown in ball-and-stick representation: Cys108 in yellow, His278 in purple and Asn298 in pink. His189 on the occluding loop is shown in purple in ball-and-stick representation. The propeptide is shown in grey; (B) Catalytic residues are shown in ball-and-stick representation: Cys133 in yellow, His276 in purple and Asn296 in pink. E-64 is shown in grey in ball-and-stick representation; (C) Catalytic residues are shown in ball-and-stick representation: Cys138 (engineered to be serine) in yellow, His276 in purple and Asn300 in pink. The propeptide is shown in grey; (D) Catalytic residues are shown in ball-and-stick representation: Cys139 (engineered to be serine) in yellow, His278 in purple and Asn298 in pink; (E) One subunit of the dimer is shown. Catalytic residues are shown in ball-and-stick representation: Cys92 in yellow, His241 in purple and Asn261 in pink. The propeptide is shown in grey.

**TABEL S1.** Characteristics of the 21 GBM patients. Glioblastoma patients were operated at the Department of Neurosurgery of the University of Ljubljana, University Medical Centre Ljubljana, Slovenia. 6 out of 21 patients were females (median age 60.5 years), whereas the mean age of males was 62 years

| Number | Gender | Age at the time of operation (years) | Survival (months) | Newly-diagnosed or recurrent | Therapy (radio- or chemotherapy with temozolomide)                         | IDH mutation |
|--------|--------|--------------------------------------|-------------------|------------------------------|----------------------------------------------------------------------------|--------------|
| 1      | M      | 46                                   | 17                | Newly-diagnosed              | Radiotherapy (60 Gy) + temozolomide, adjuvant temozolomide therapy         | No           |
| 2      | M      | 81                                   | 7                 | Newly-diagnosed              | Radiotherapy (30 Gy)                                                       | No           |
| 3      | F      | 48                                   | 8                 | Newly-diagnosed              | Radiotherapy (60 Gy) + temozolomide, adjuvant temozolomide therapy         | No           |
| 4      | F      | 62                                   | 32                | Newly-diagnosed              | Radiotherapy (60 Gy) + temozolomide, adjuvant temozolomide therapy         | No           |
| 5      | M      | 81                                   | 0                 | Newly-diagnosed              | /                                                                          | No           |
| 6      | M      | 43                                   | 21                | Newly-diagnosed              | Radiotherapy (60 Gy) + temozolomide, adjuvant temozolomide therapy         | Yes, R132H   |
| 7      | F      | 56                                   | 15                | Newly-diagnosed              | Radiotherapy (60 Gy) + temozolomide, adjuvant temozolomide therapy         | No           |
| 8      | M      | 54                                   | 3                 | Newly-diagnosed              | Radiotherapy (60 Gy) + temozolomide, without adjuvant temozolomide therapy | No           |
| 9      | M      | 55                                   | 26                | Newly-diagnosed              | Radiotherapy (60 Gy) + temozolomide, adjuvant temozolomide therapy         | No           |
| 10     | M      | 75                                   | 17                | Newly-diagnosed              | Radiotherapy (60 Gy) + temozolomide, adjuvant temozolomide therapy         | No           |
| 11     | M      | 66                                   | 8                 | Newly-diagnosed              | Radiotherapy (60 Gy) + temozolomide, adjuvant temozolomide therapy         | No           |
| 12     | M      | 59                                   | 16                | Newly-diagnosed              | Radiotherapy (60 Gy) + temozolomide, adjuvant temozolomide therapy         | No           |
| 13     | F      | 59                                   | 16                | Newly-diagnosed              | Radiotherapy (60 Gy) + temozolomide, without adjuvant temozolomide therapy | No           |
| 14     | F      | 66                                   | 8                 | Newly-diagnosed              | Radiotherapy (60 Gy) + temozolomide, adjuvant temozolomide therapy         | No           |
| 15     | F      | 67                                   | 3                 | Newly-diagnosed              | Radiotherapy (30 Gy)                                                       | No           |
| 16     | M      | 53                                   | 12                | Newly-diagnosed              | Radiotherapy (60 Gy) + temozolomide, adjuvant temozolomide therapy         | No           |
| 17     | M      | 59                                   | 1                 | Newly-diagnosed              | Without therapy                                                            | No           |
| 18     | M      | 65                                   | 13                | Newly-diagnosed              | Radiotherapy (60 Gy) + temozolomide, adjuvant temozolomide therapy         | No           |
| 19     | M      | 62                                   | 12                | Newly-diagnosed              | Radiotherapy (60 Gy) + temozolomide, adjuvant temozolomide therapy         | No           |
| 20     | M      | 71                                   | 12                | Newly-diagnosed              | Radiotherapy (30 Gy) + temozolomide, adjuvant temozolomide therapy         | No           |
| 21     | M      | 80                                   | 9                 | Newly-diagnosed              | Radiotherapy (30 Gy)                                                       | No           |

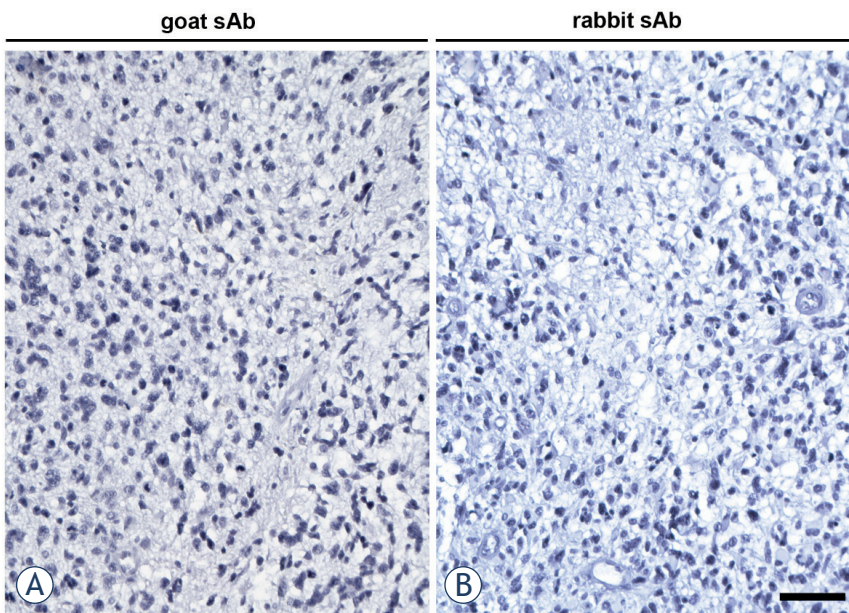

**FIGURE S2.** Control incubations of paraffin-embedded GBM sections for IHC. Control incubations were performed in the absence of primary antibodies and with goat (A) or rabbit (B) secondary horse-radish-peroxidase–conjugated antibodies (sAb) in the final dilution of 1:200. Scale bar = 50  $\mu$ m.
